# Supplementary material for: Photocatalytic asymmetric epoxidation of trans-stilbene with manganese–porphyrin/graphene-oxide nanocomposite and molecular oxygen: axial ligand effect
Source: Royal Society of Chemistry journal article supplement (doi:10.1039/d0cy00441c), 2020-01-01
Supplement: d0cy00441c1.pdf [file d0cy00441c1.pdf]

## Electronic Supplementary Information (ESI)

### Photocatalytic asymmetric epoxidation of *trans*-stilbene with manganese-porphyrin/graphene oxide nanocomposite and molecular oxygen: axial ligand effect

Elahe Ahadi,<sup>a</sup> Hassan Hosseini-Monfared,<sup>a,b,\*</sup> Alex Spieß<sup>c</sup> and Christoph Janiak<sup>c</sup>

Elahe Ahadi,<sup>a</sup> Hassan Hosseini-Monfared,<sup>a,b,\*</sup> Alex Spieß,<sup>c</sup> Christoph Janiak<sup>c</sup>

<sup>a</sup> Department of Chemistry, University of Zanjan 45195-313, Zanjan, Iran.

<sup>b</sup> Department of Chemistry, Amirkabir University of Technology, Tehran, Iran.

Email: [hahomonfared@gmail.com](mailto:hahomonfared@gmail.com)

ORCID ID: 0000-0001-9157-8198

<sup>c</sup> Institut für Anorganische Chemie und Strukturchemie, Heinrich-Heine-Universität, 40204 Düsseldorf, Germany. E-

mail: [janiak@hhu.de](mailto:janiak@hhu.de)

ORCID ID: 0000-0002-6288-9605

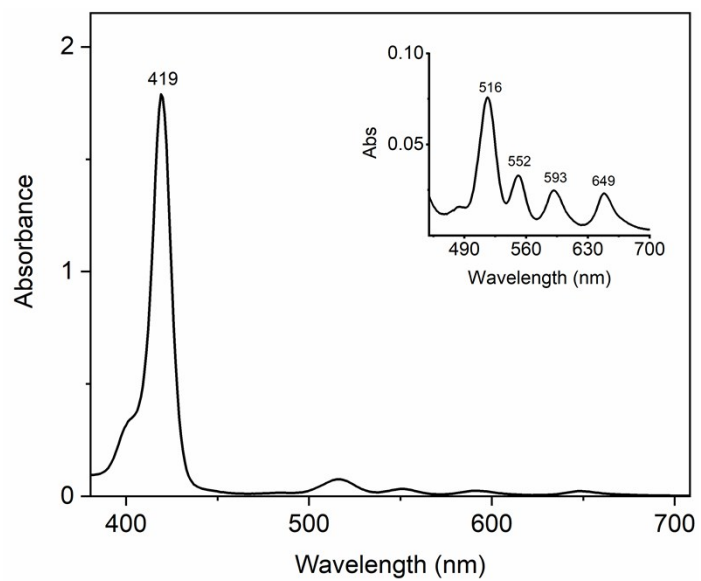

Fig. S1 Electronic absorption of the synthesized H<sub>2</sub>T<sub>2</sub>PyP in CH<sub>2</sub>Cl<sub>2</sub> (c = 0.05 M); inset shows the Q bands

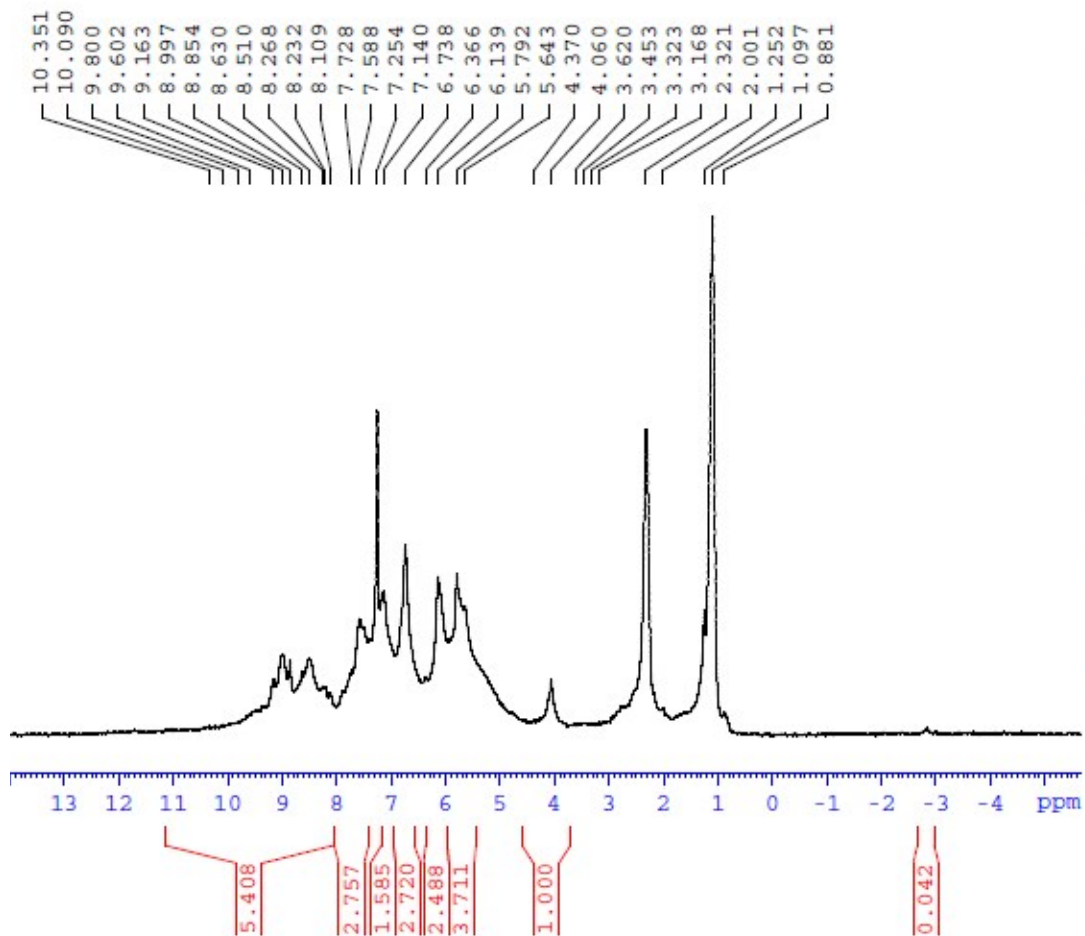

Fig. S2  $^1\text{H-NMR}$  spectrum of the synthesized  $\text{H}_2\text{T}_2\text{PyP}$  in  $\text{CDCl}_3$  (250 MHz):  $\delta$  ppm = -2.80 (2H, br, s, NH), 7.50-8.47 (4 *m*-H, adjacent to heteroatom), 5.78-6.74 (4 *m*-H), 8.86-8.98 (4 *o*-H), 5.73-5.78 (4 *p*-H), 8.53 (8H<sub>6</sub>).

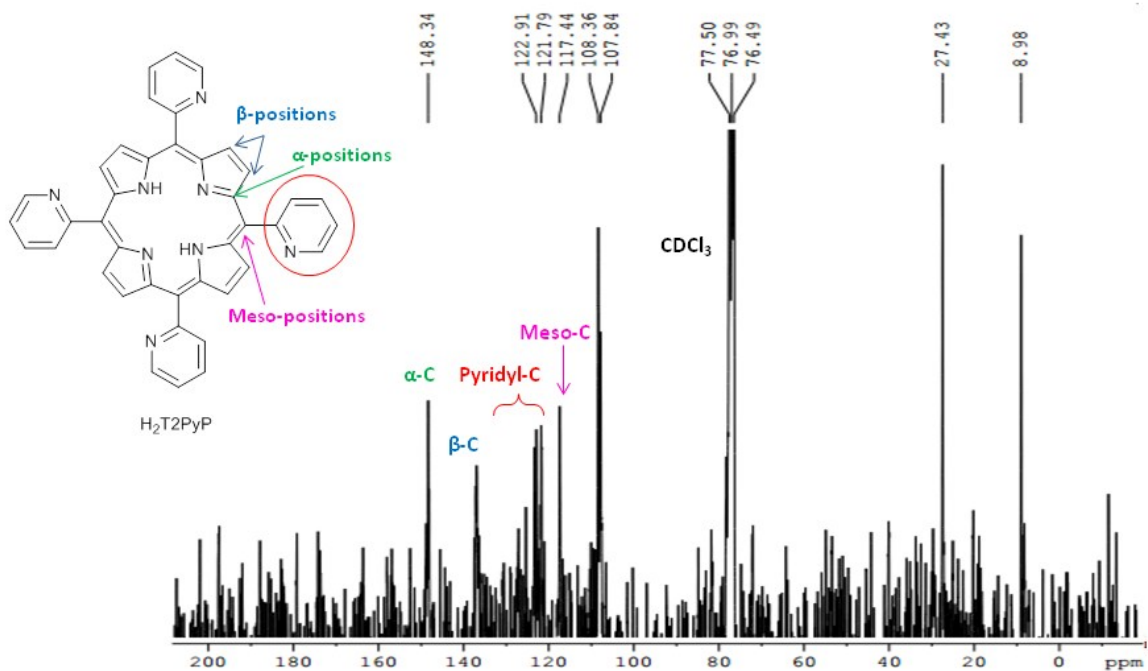

Fig. S3  $^{13}\text{C}$ -NMR spectrum of the synthesized s  $\text{H}_2\text{T2PyP}$  in  $\text{CDCl}_3$  (250 MHz).

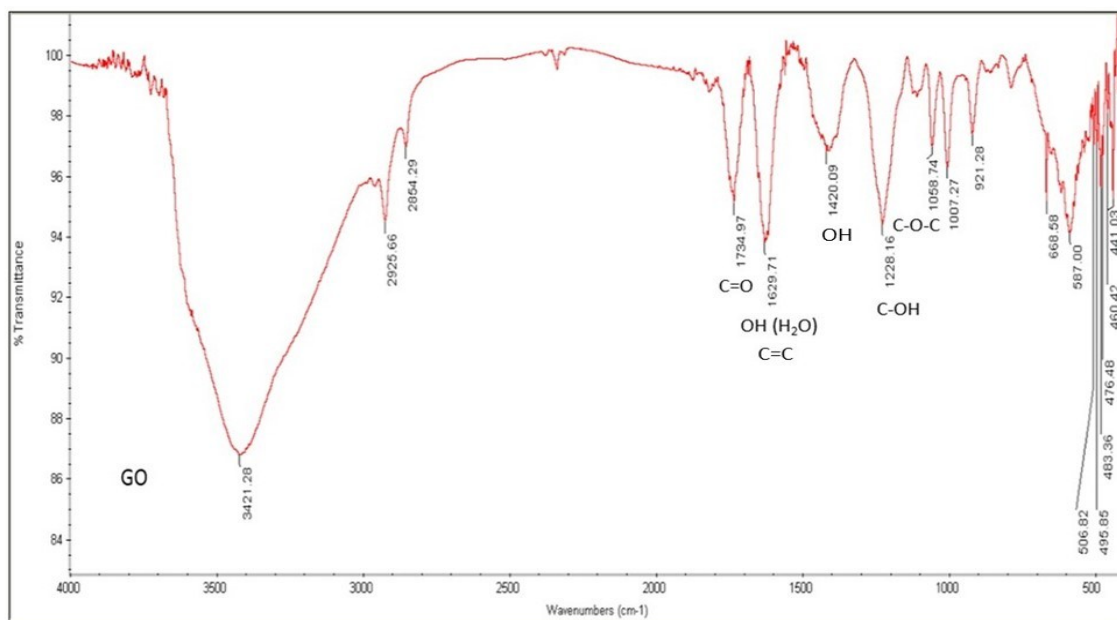

Fig. S4 FT-IR spectrum of the synthesized GO

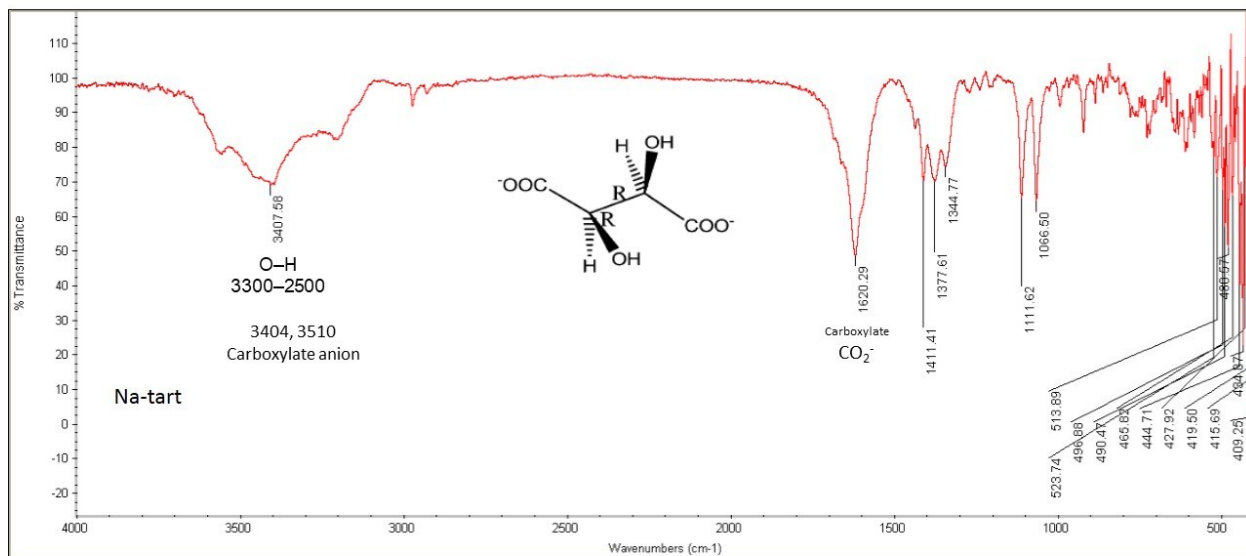

Fig. S5 FT-IR spectrum of sodium tartrate.

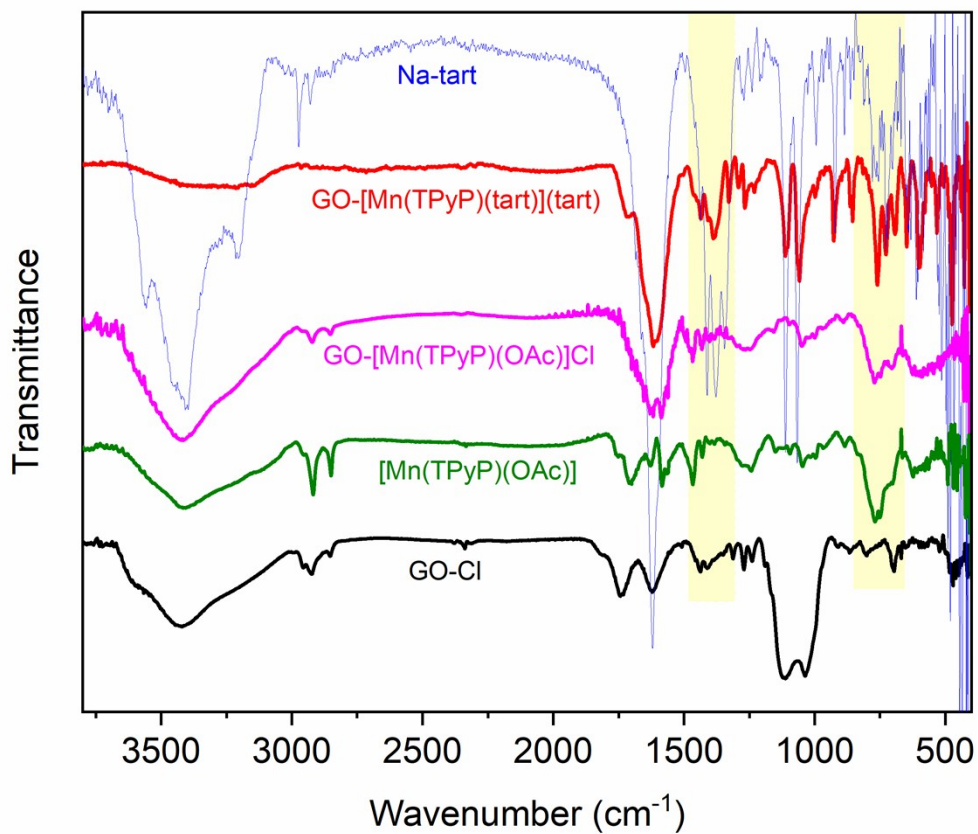

Fig. S6 FTIR spectra of the photocatalyst and the intermediates.

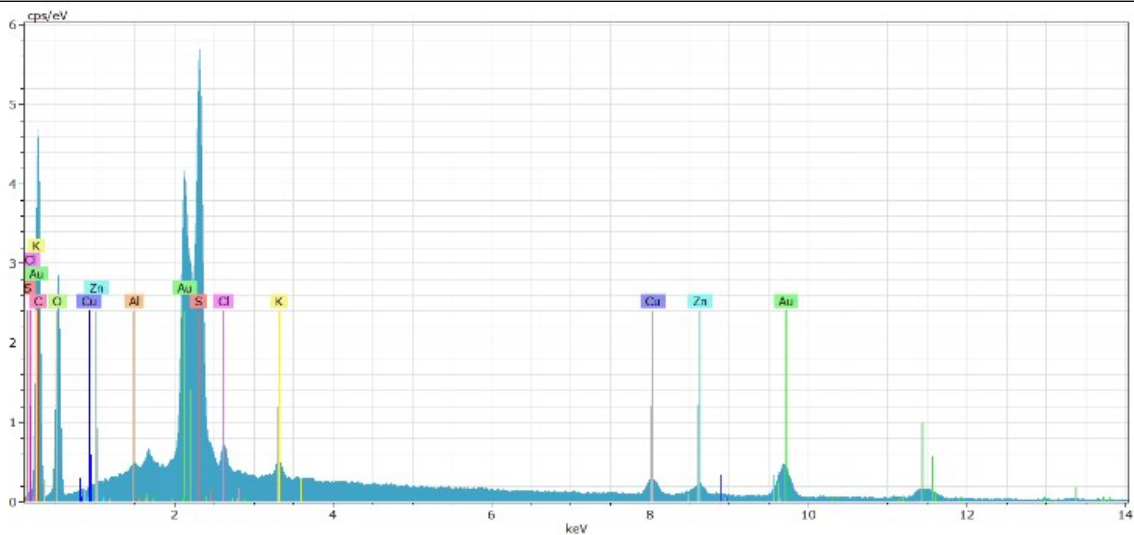

E1 02 Serie unnorm. C norm. C Atom. C Fehler (1 Sigma)  
 [Gew.-%] [Gew.-%] [At.-%] [Gew.-%]

|    |    |         | unnorm. C | norm. C  | Atom. C | Fehler (1 Sigma) |
|----|----|---------|-----------|----------|---------|------------------|
|    |    |         | [Gew.-%]  | [Gew.-%] | [At.-%] | [Gew.-%]         |
| C  | 6  | K-Serie | 33.92     | 40.68    | 66.55   | 4.48             |
| O  | 8  | K-Serie | 15.34     | 18.39    | 22.59   | 2.17             |
| S  | 16 | K-Serie | 8.15      | 9.78     | 5.99    | 0.32             |
| Au | 79 | L-Serie | 20.71     | 24.83    | 2.48    | 0.68             |
| Cu | 29 | K-Serie | 2.05      | 2.45     | 0.76    | 0.10             |
| Zn | 30 | K-Serie | 1.68      | 2.01     | 0.60    | 0.09             |
| Cl | 17 | K-Serie | 0.83      | 1.00     | 0.55    | 0.06             |
| K  | 19 | K-Serie | 0.53      | 0.64     | 0.32    | 0.05             |
| Al | 13 | K-Serie | 0.18      | 0.22     | 0.16    | 0.04             |

Summe: 83.39 100.00 100.00

EDX of GO

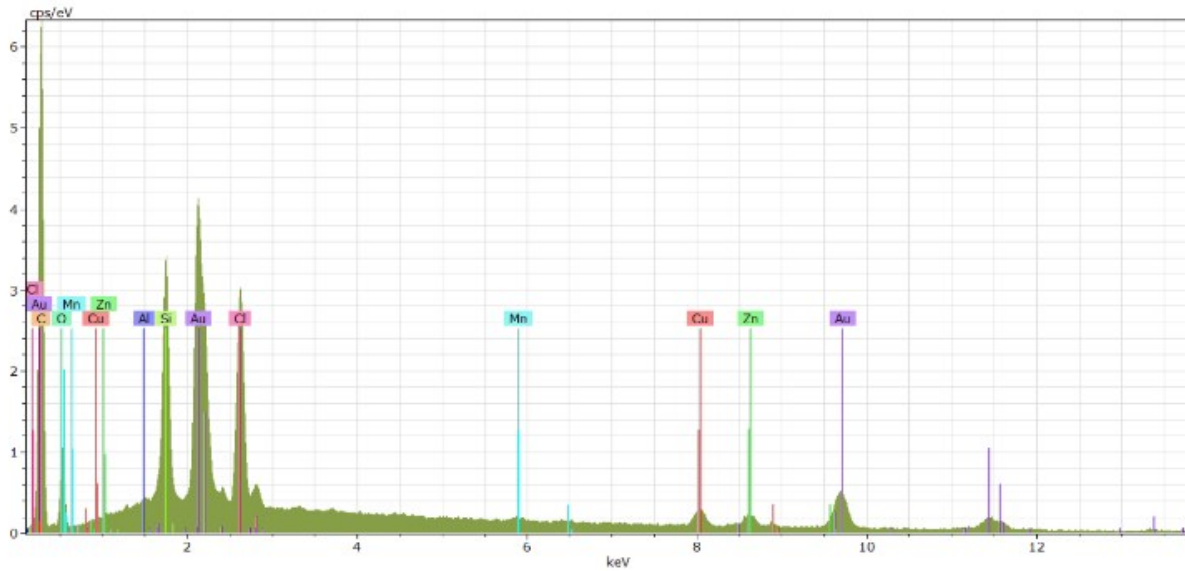

| El     | OZ | Serie   | unn. [Gew. %] | C norm. [Gew. %] | C Atom. [At. %] | C Fehler (1 Sigma) [Gew. %] |
|--------|----|---------|---------------|------------------|-----------------|-----------------------------|
| C      | 6  | K-Serie | 46.63         | 50.15            | 81.73           | 5.93                        |
| O      | 8  | K-Serie | 6.41          | 6.89             | 8.43            | 1.09                        |
| Au     | 79 | L-Serie | 27.30         | 29.36            | 2.92            | 0.88                        |
| Cl     | 17 | K-Serie | 4.90          | 5.27             | 2.91            | 0.20                        |
| Si     | 14 | K-Serie | 3.38          | 3.64             | 2.53            | 0.17                        |
| Cu     | 29 | K-Serie | 2.24          | 2.40             | 0.74            | 0.10                        |
| Zn     | 30 | K-Serie | 1.88          | 2.02             | 0.61            | 0.10                        |
| Al     | 13 | K-Serie | 0.08          | 0.09             | 0.06            | 0.03                        |
| Mn     | 25 | K-Serie | 0.16          | 0.17             | 0.06            | 0.04                        |
| Summe: |    |         | 92.98         | 100.00           | 100.00          |                             |

EDX of GO-[Mn(T2PyP)(OAc)]Cl

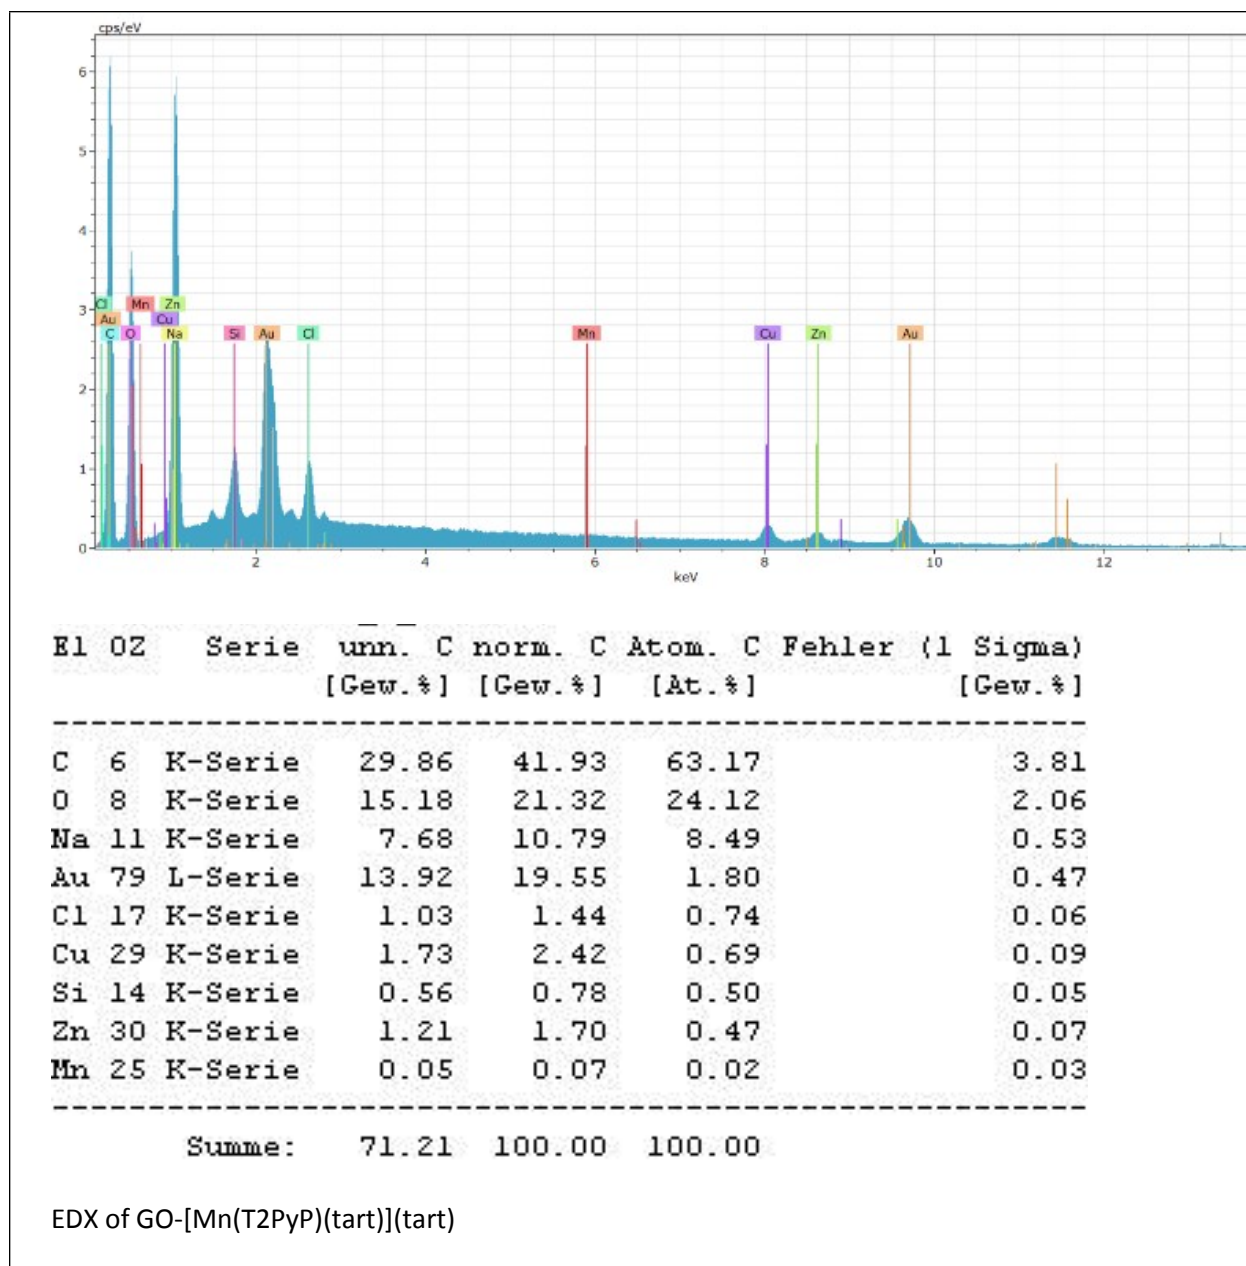

Fig. S7 EDX analysis of GO, GO-[Mn(T2PyP)(OAc)Cl] and GO-[Mn(T2PyP)(tart)](tart).



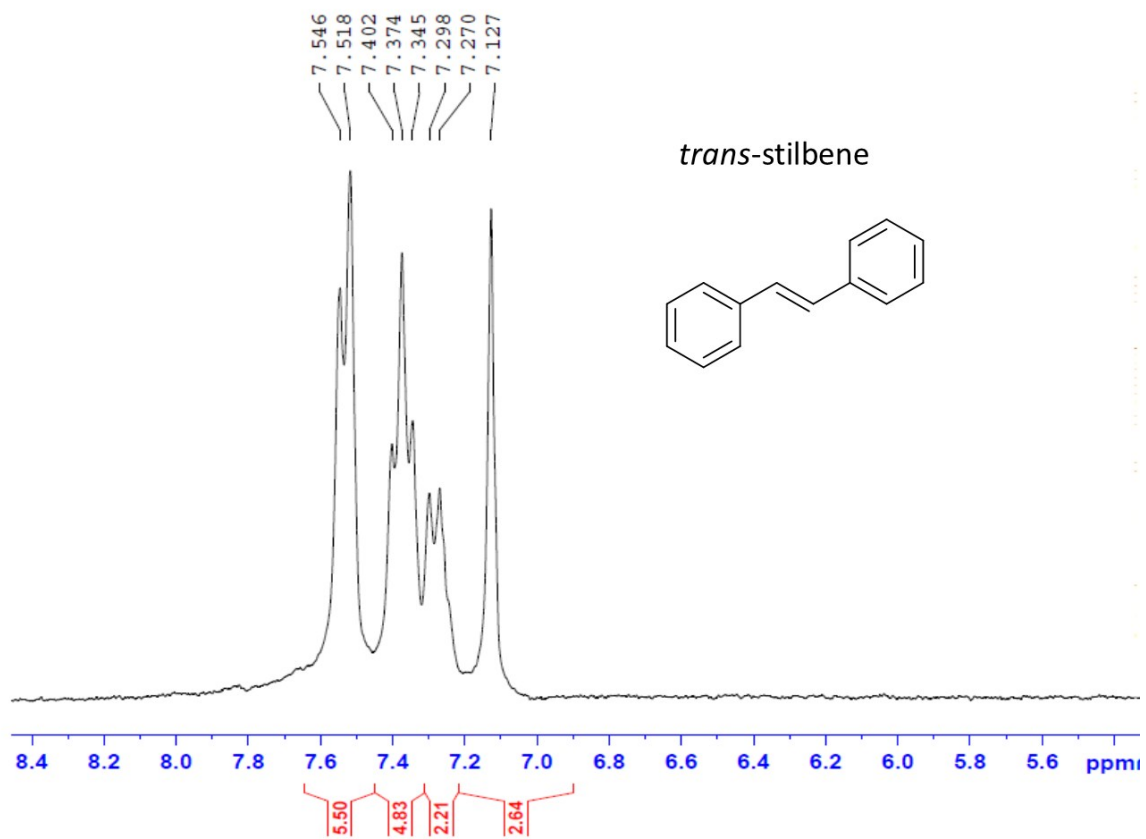

Fig. S8  $^1\text{H-NMR}$  spectrum of the starting substrate in  $\text{CDCl}_3$  (250 MHz).

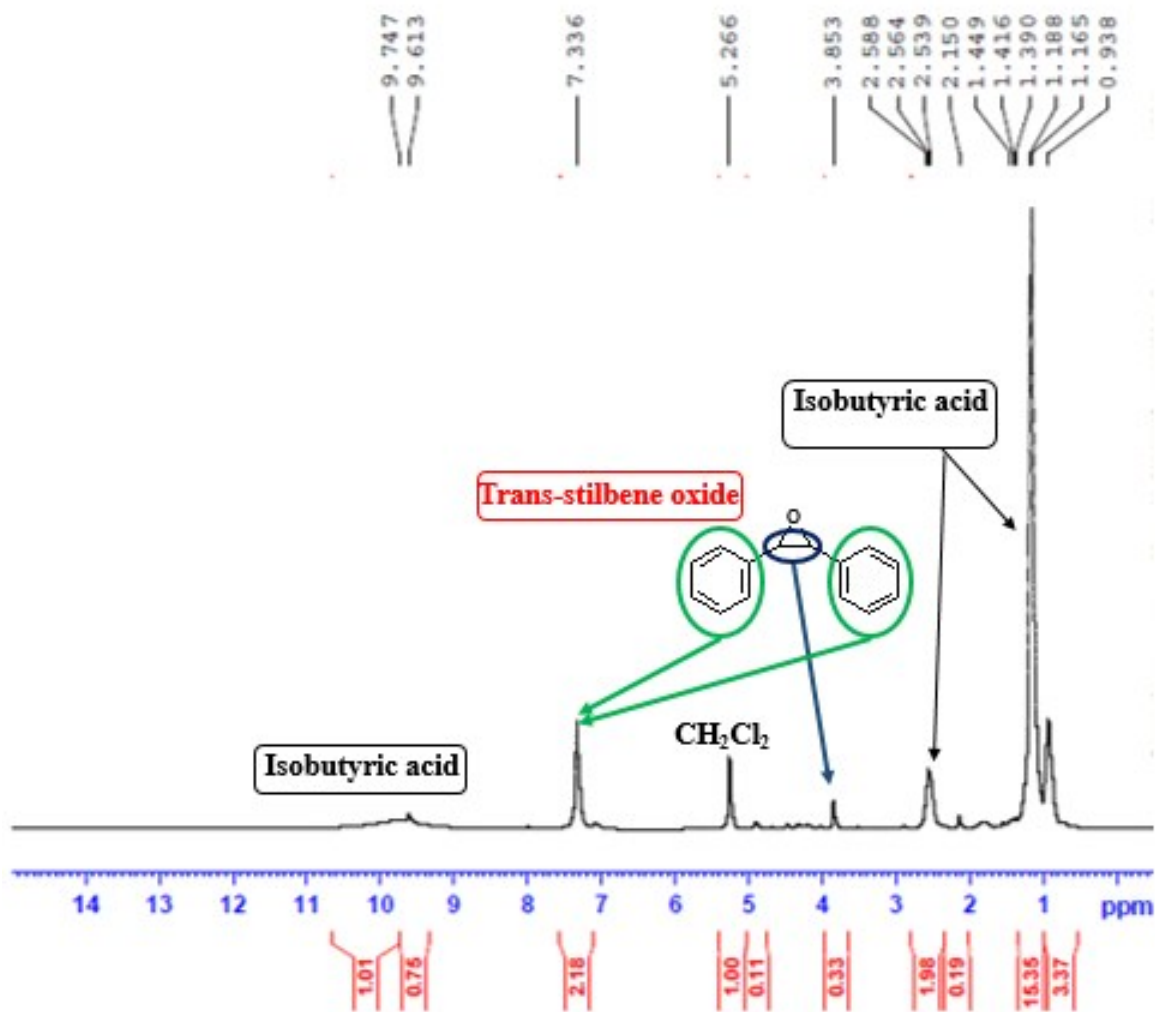

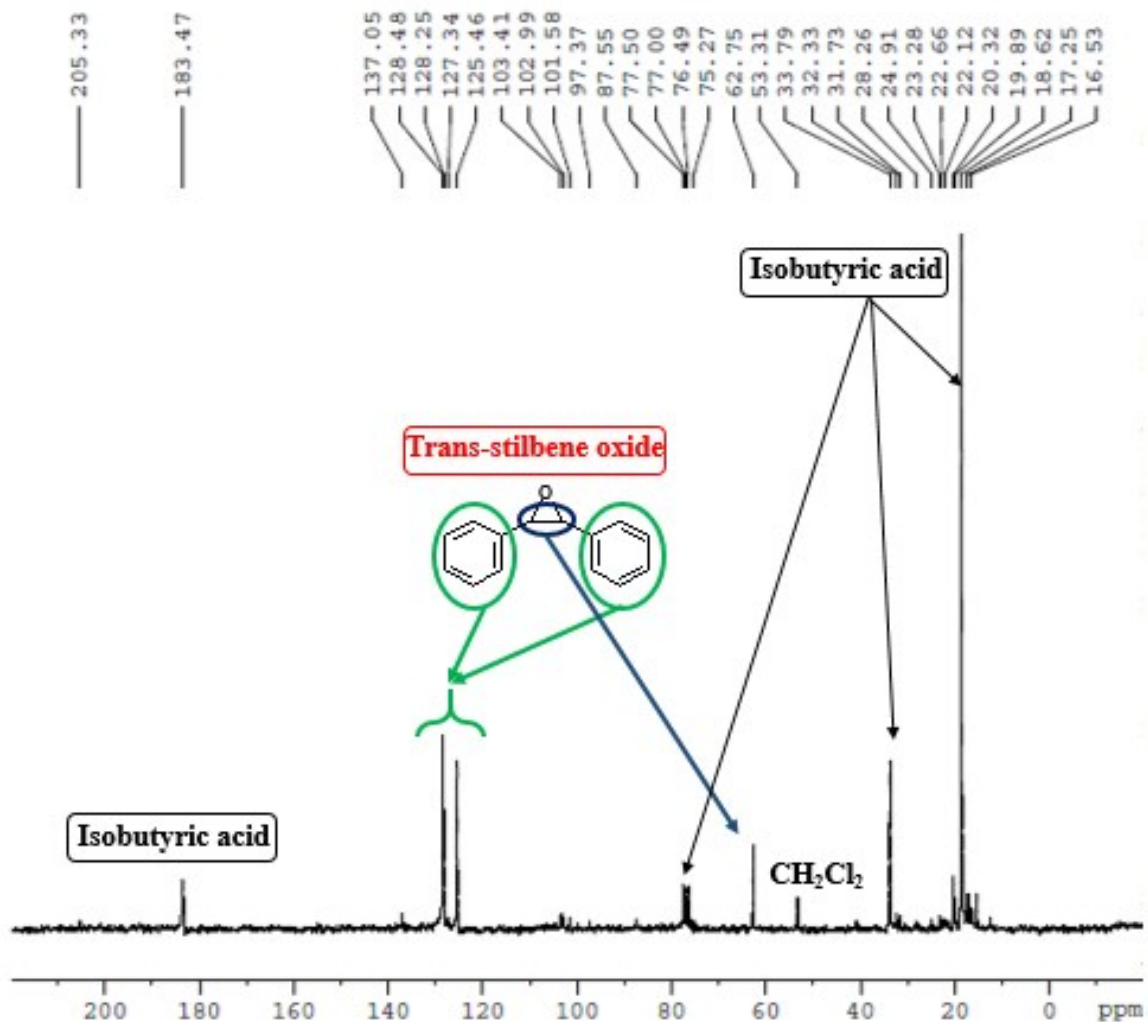

Fig. S9 <sup>1</sup>H-NMR (A) and <sup>13</sup>C-NMR (B) spectra of the crude reaction mixture in CDCl<sub>3</sub>. Reaction conditions: [Mn(T2PyP)(OAc)] (0.50 mg, 0.00071 mmol) or chiral GO-[Mn(T2PyP)(tart)](tart) (0.0397 g, containing 0.71 μmol Mn), imidazole (0.096 mg, 0.00142 mmol), *trans*-stilbene (0.127 g, 0.71 mmol), isobutyraldehyde (250 mg, 3.55 mmol), and reaction time 80 min.

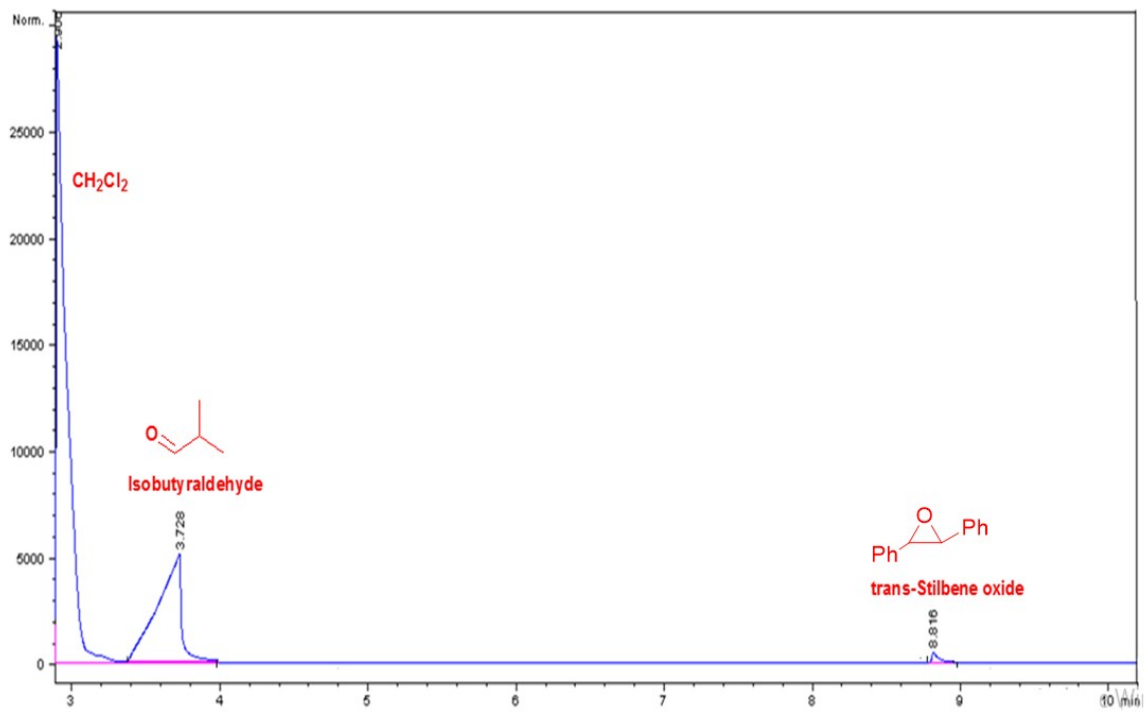

Fig. S10 Chromatogram of the reaction products.

Reaction conditions:  $[\text{Mn}(\text{T}2\text{PyP})(\text{OAc})]$  (0.50 mg, 0.00071 mmol), imidazole (0.096 mg, 0.00142 mmol), *trans*-stilbene (0.127 g, 0.71 mmol), isobutyraldehyde (250 mg, 3.55 mmol), and reaction time 80 min. GC column HP-5, flow rate 10 mL/min, initial temperature 25 °C, final temperature 190 °C, temperature gradient 10 °C/min, injected volume 2 microliter.

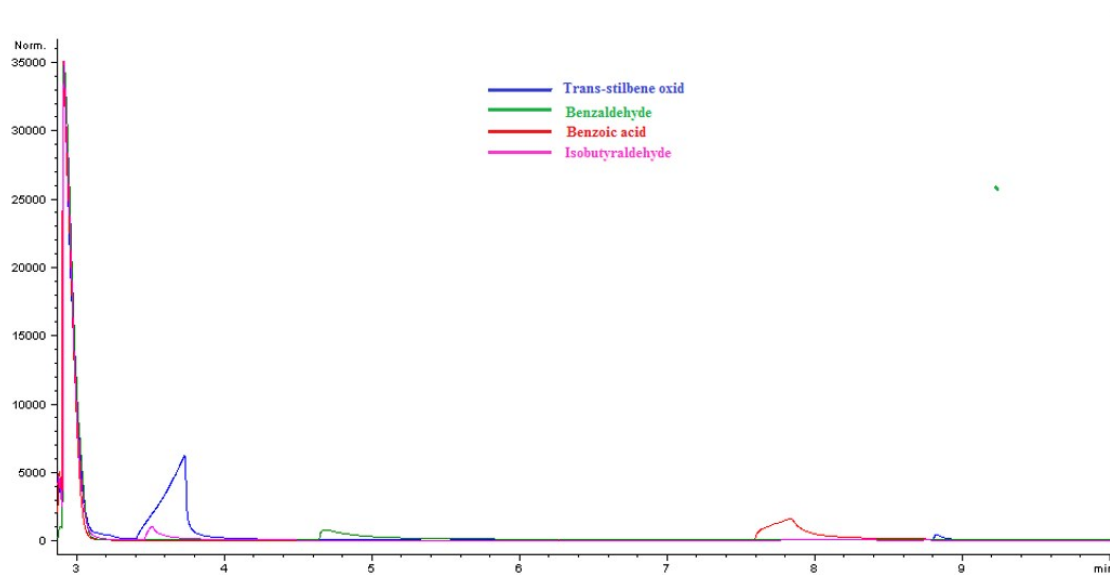

Fig. S11 GC chromatograms of the authentic samples: the reaction mixture (blue line); benzaldehyde (green); benzoic acid (red); isobutyraldehyde (pink) in  $\text{CH}_2\text{Cl}_2$ .

Reaction conditions: GO-[Mn(T2PyP)(tart)](tart) (0.0397 mg, 0.00071 mmol), imidazole (0.096 mg, 0.00142 mmol), *trans*-stilbene (0.127 g, 0.71 mmol), isobutyraldehyde (250 mg, 3.55 mmol), white LED light (80 W),  $\text{O}_2$  1.0 atm, temperature 25 °C and reaction time 80 min.

GC column HP-5, flow rate 10 mL/min, initial temperature 25 °C, final temperature 190 °C, temperature gradient 10 °C/min, injected volume 2 microliter.

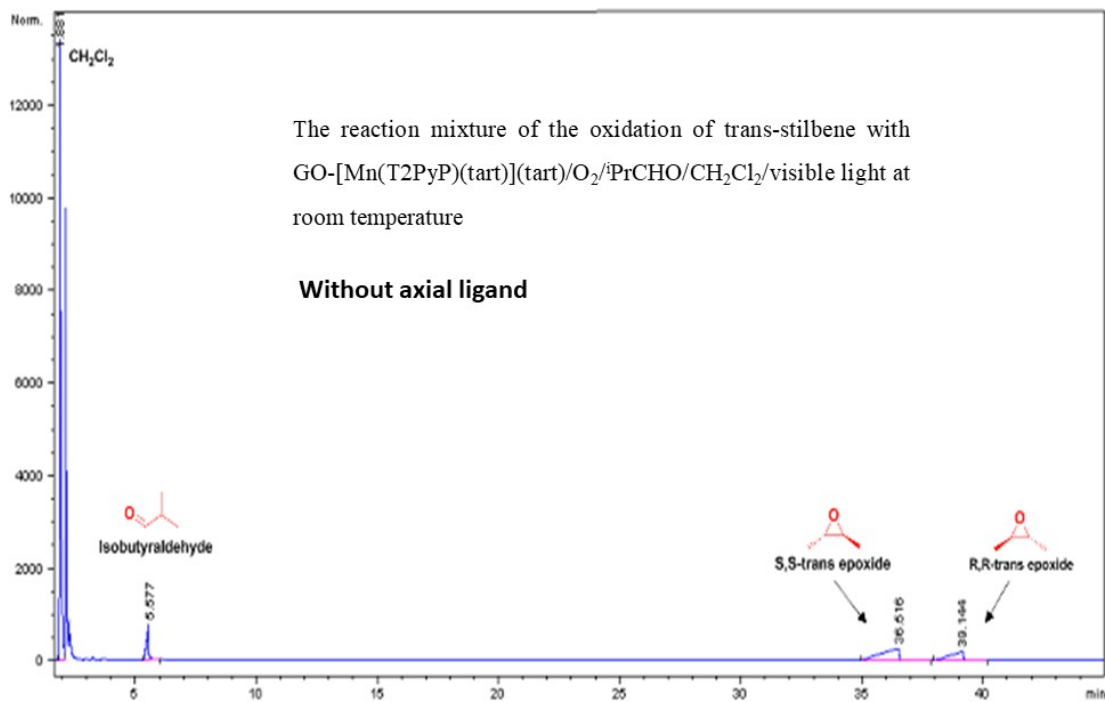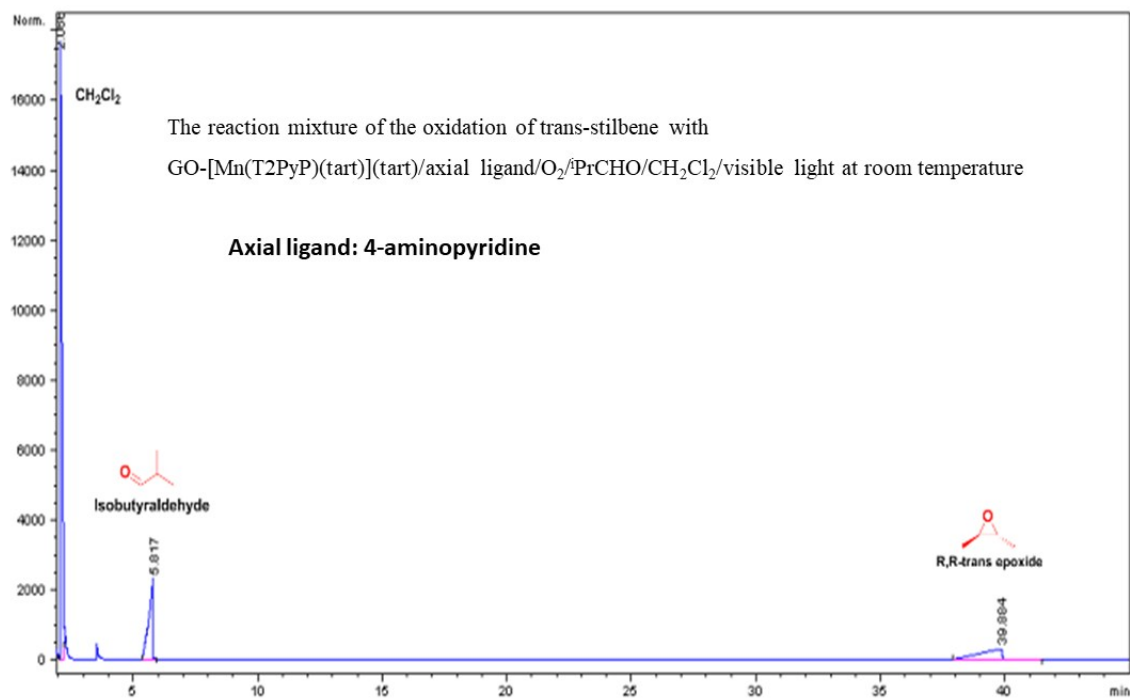

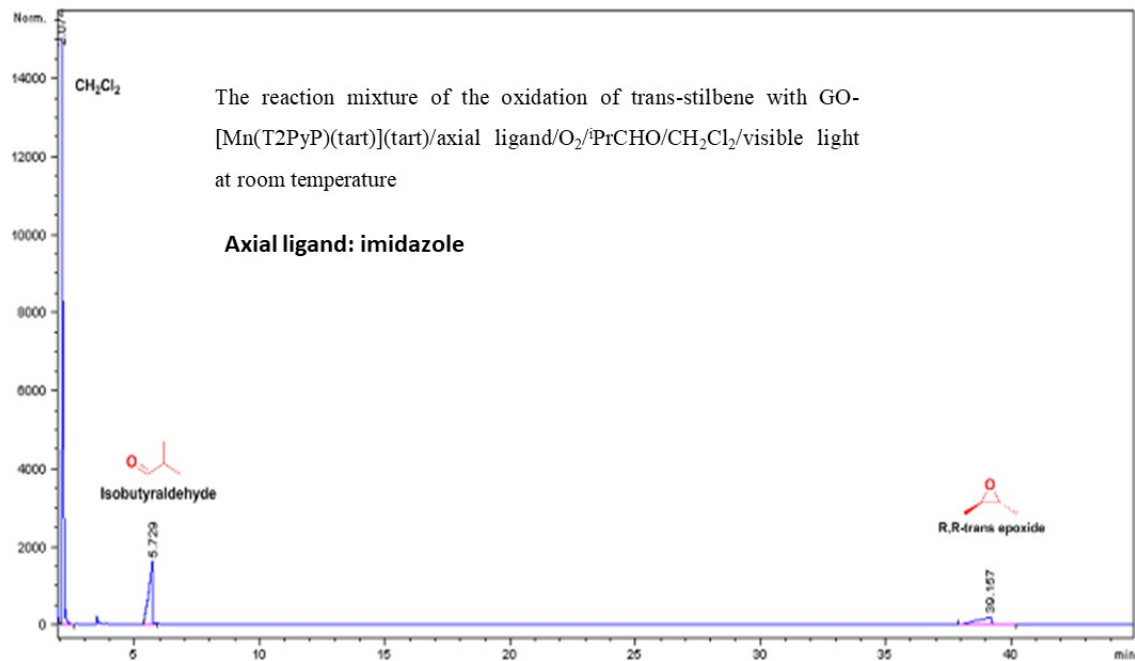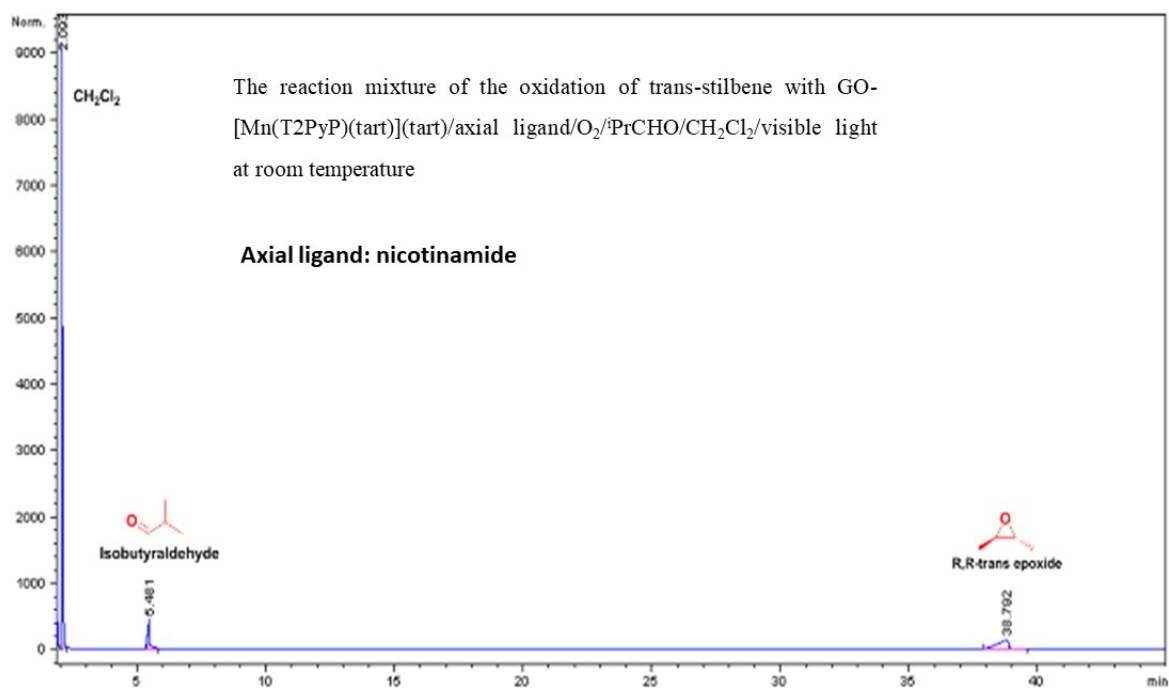

Fig. S12 GC chromatograms the reaction products with chiral column. GC column SGE-CYDEX-B capillary column (25 m × 0.22 mm ID × 0.25 μm), flow rate 10 mL/min, initial temperature 25 °C, final temperature 190 °C, temperature gradient 10 °C/min. Reaction conditions: Catalyst GO-[Mn(T2PyP)(tart)](tart) (0.71 μmol), axial ligand (1.42 μmol), <sup>i</sup>PrCHO (3.55 mmol), oxygen 1 bar, CH<sub>2</sub>Cl<sub>2</sub> 1 mL at room temperature under white LED (40 W) light.

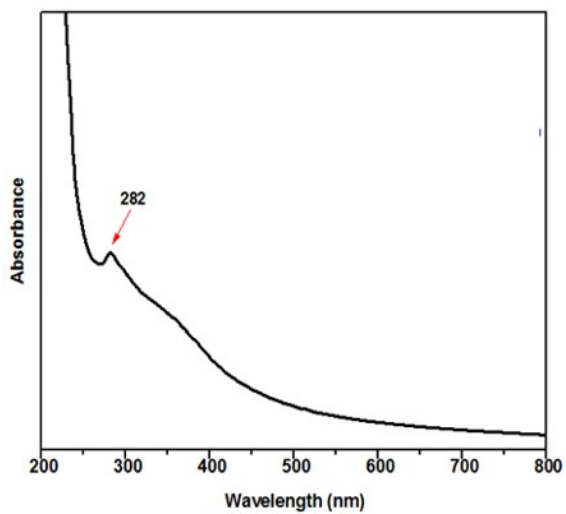

Fig. S13 UV-vis spectrum of GO-Cl in water

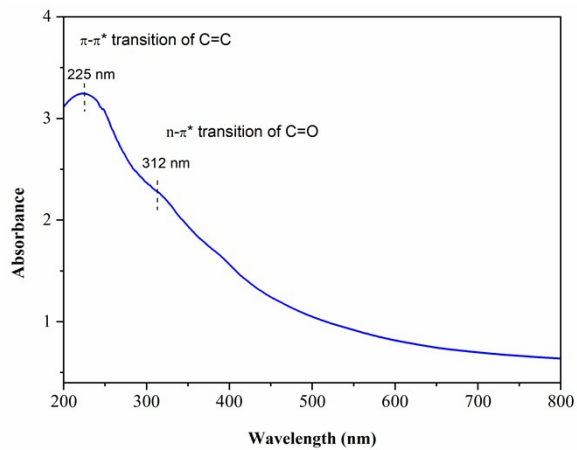

Fig. S14 UV-vis spectrum of GO recorded in aqueous solution.

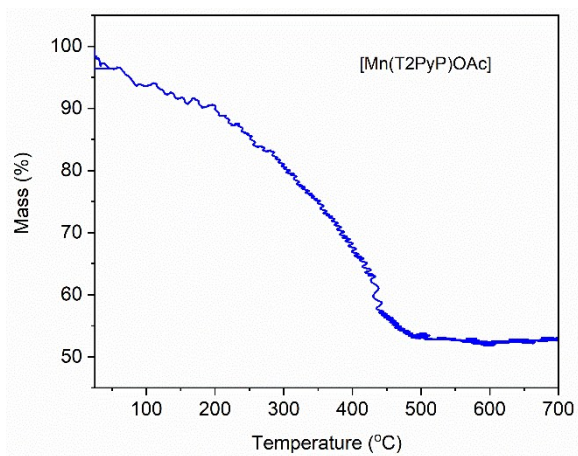

Fig. S15 Thermogravimetric analysis of [Mn(T2PyP)Oac]
